# Supplementary material for: A novel “turn-on” fluorogenic probe for sensing hypochlorous acid based on BODIPY
Source: Royal Society of Chemistry journal article supplement (doi:10.1039/c5ra14118d), 2015-01-01
Supplement: c5ra14118d1.pdf [file c5ra14118d1.pdf]

## Electronic Supplementary Information

### A novel “turn-on” fluorogenic probe for sensing hypochlorous acid based on BODIPY

Enze Wang <sup>a</sup>, Han Qiao <sup>a</sup>, Yanmei Zhou <sup>a,\*</sup>, Lanfang Pang <sup>a</sup>, Fang Yu <sup>a</sup>, Junli Zhang <sup>b</sup>, Tongsen  
Ma <sup>a</sup>

<sup>a</sup> *Institute of Environmental and Analytical Sciences, College of Chemistry and Chemical Engineering, Henan University, Kaifeng, Henan 475004, P.R. China*

<sup>b</sup> *Key Laboratory of Plant Stress Biology, Henan University, Kaifeng 475004, PR  
China*

---

\* Correspond author: Tel: +86-371-22868833-3422; Fax: +86-371-23881589

E-mail address: [zhouyanmei@henu.edu.cn](mailto:zhouyanmei@henu.edu.cn) (Y.M. Zhou)

---

|                                                                                       |   |
|---------------------------------------------------------------------------------------|---|
| Synthesis of BODIPY and BODIPY-AL.....                                                | 3 |
| Reference.....                                                                        | 3 |
| Figure S1. Effect of fraction of water on the interaction of Bodipy-Hy with HOCl..... | 4 |
| Figure S2. Effect of pH on the interaction of Bodipy-Hy with HOCl.....                | 4 |
| Figure S3. Linearity of Bodipy-Hy with HOCl.....                                      | 5 |
| Figure S4. TLC image of the reaction of Bodipy-Hy with HOCl.....                      | 5 |
| Figure S5. <sup>1</sup> H NMR of Bodipy-Hy.....                                       | 6 |
| Figure S6. <sup>13</sup> C NMR of Bodipy-Hy.....                                      | 6 |
| Figure S7. Mass spectrometry of Bodipy-Hy.....                                        | 7 |
| Figure S8. The isolated of Bodipy-Hy + HOCl.....                                      | 7 |

## Synthesis of BODIPY and BODIPY-AL

BODIPY was synthesized according to the literature procedure<sup>1</sup>. BODIPY-AL was synthesized from BODIPY by using well known Vismeyer Haack's formylation reaction<sup>2</sup>.

**BODIPY:** The mixed solution of 2,4-dimethylpyrrole (19.0 mmol, 2mL), benzoyl chloride (9.5 mmol, 1.15 mL) and DCM (50 mL) was stirred overnight at room temperature under N<sub>2</sub> atmosphere. Then triethylamine (10 mL) was added drop-by-drop in ice water bath. After stirred about 30 min under N<sub>2</sub> atmosphere, drop-by-drop addition of boron fluoride ethyl ether (10 mL) was begun. The mixture was stirred overnight again at room temperature under N<sub>2</sub> atmosphere. The organic phase was washed with saturated NaHCO<sub>3</sub> solution (100 mL), and then washed with water for three times and dried with anhydrous sodium sulfate. The product was purified by column chromatography (petroleum ether-dichloromethane, v:v, 5:1) to give a orange solid (1.2 g, 38%).

**BODIPY-AL:** To a 100 mL round-bottomed flask, POCl<sub>3</sub> (3 mL) was added in a solution of DMF (3 mL) in ice water bath under N<sub>2</sub> atmosphere. After stirred about 30 min, viscid liquid with yellow was appeared. When the temperature rise to 50 °C, drop-by-drop addition of 30 mL DCE solution of BODIPY (3.1 mmol, 1 g) was begun. The mixture was stirred for 8 h at 55 °C under N<sub>2</sub> atmosphere. Following the completion of the reaction, saturated NaHCO<sub>3</sub> solution (200 mL) was added in ice water bath, then stirred for 30 min. The organic phase was washed with 100 mL water for three times and dried with anhydrous sodium sulfate. The product was purified by column chromatography (dichloromethane-methanol, v:v, 10:1) to give a orange solid (0.9 g, 81%).

## Reference

1. M. Emrullahoglu, M. Ucuncu and E. Karakus, Chem. Commun., 2013, 49, 7836-7838.
2. M. Isik, T. Ozdemir, I. S. Turan, S. Kolemen and E. U. Akkaya, Org. Lett., 2013, 15, 216-219.

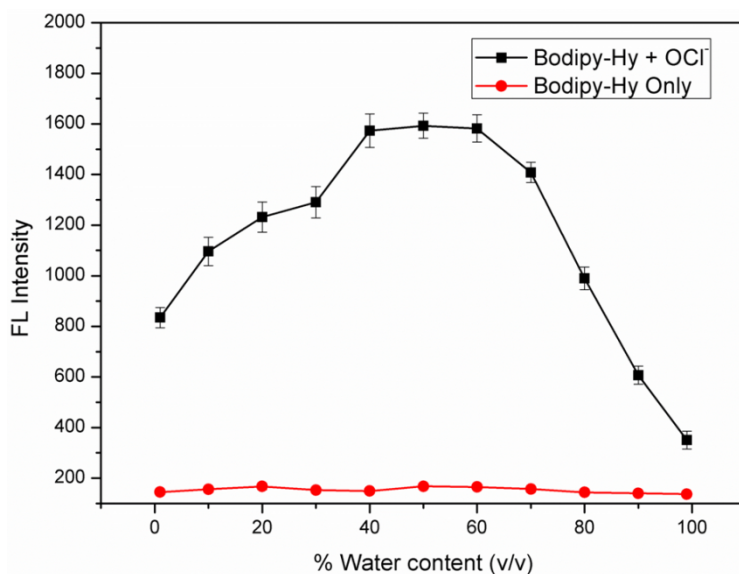

**Fig. S1.** Effect of fraction of water on the interaction of Bodipy-Hy (10  $\mu\text{M}$ ) with HOCl (200  $\mu\text{M}$ , 20 equiv.) in 0.1 M phosphate buffer-ethanol (pH 7.20) solution ( $\lambda_{\text{ex}}=465$  nm,  $\lambda_{\text{em}}=510$  nm at 25  $^{\circ}\text{C}$ ).

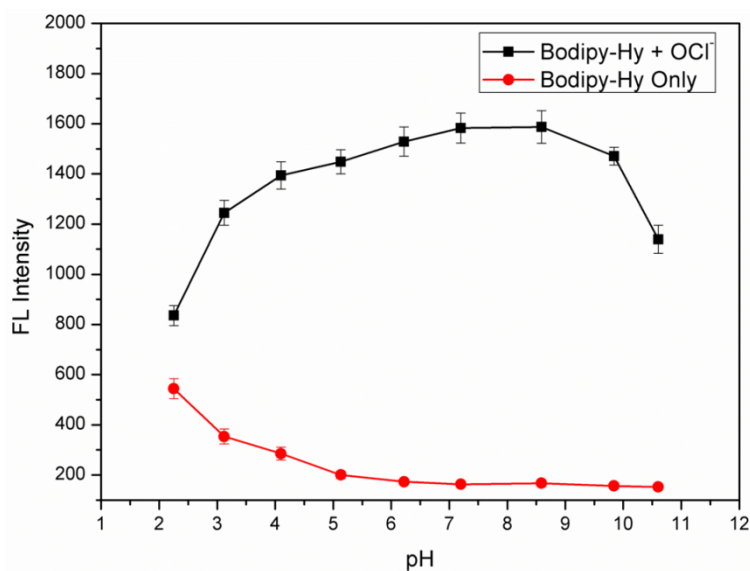

**Fig. S2.** Effect of pH on the interaction of Bodipy-Hy (10  $\mu\text{M}$ ) with HOCl (200  $\mu\text{M}$ , 20 equiv.) in 0.1 M phosphate buffer-ethanol (v/v, 1:1) solution ( $\lambda_{\text{ex}}=465$  nm,  $\lambda_{\text{em}}=510$  nm at 25  $^{\circ}\text{C}$ )

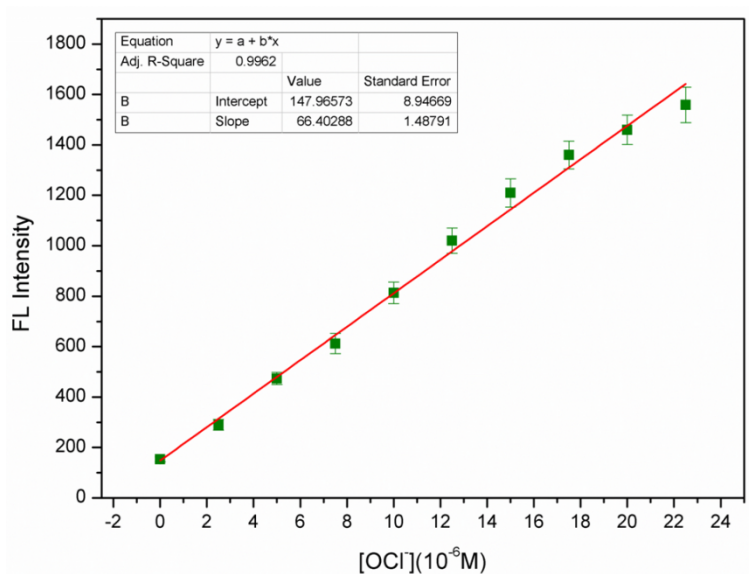

**Fig. S3.** Fluorescence intensity changes of Bodipy-Hy (10  $\mu\text{M}$ ) against HOCl concentration from 0 to 22.5  $\mu\text{M}$  in 0.1 M phosphate buffer-ethanol (pH 7.20, v/v, 1:1) solution ( $\lambda_{\text{ex}}=465$  nm,  $\lambda_{\text{em}}=510$  nm at 25  $^{\circ}\text{C}$ )

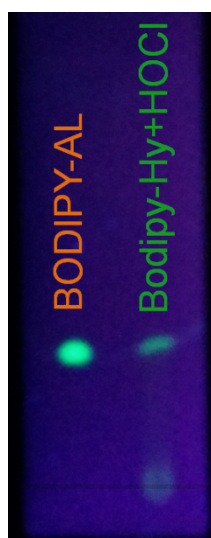

**Fig. S4.** TLC image of the reaction of Bodipy-Hy with HOCl (100/50/1, v/v/v, dichloromethane/petroleum ether/ triethylamine).

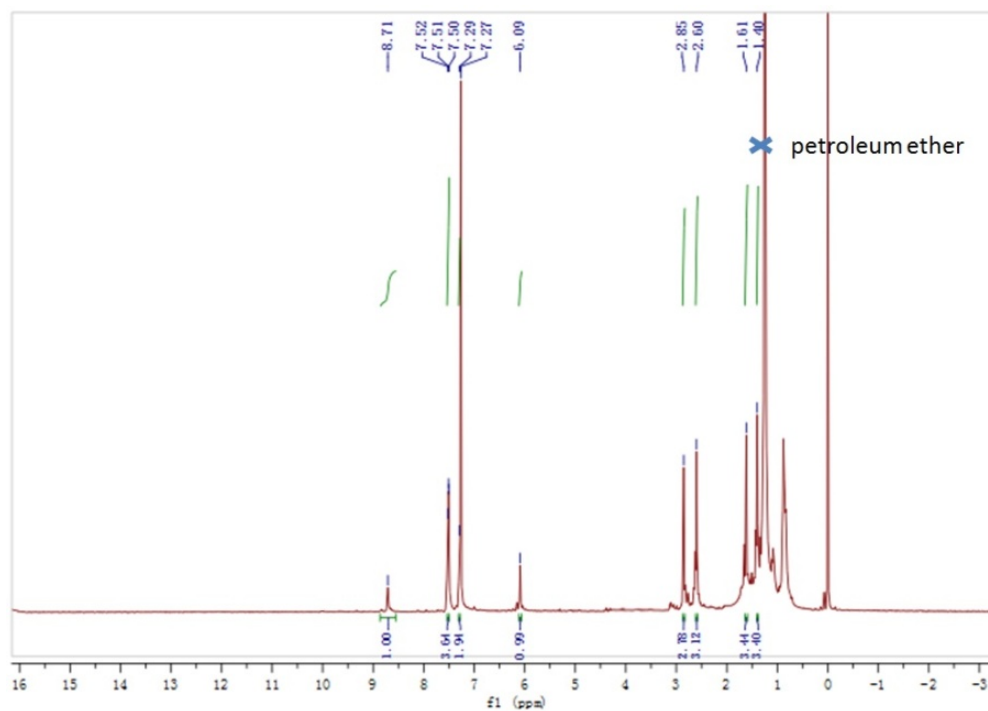

**Fig. S5.**  $^1\text{H}$  NMR of Bodipy-Hy. ( $\text{CDCl}_3$ )

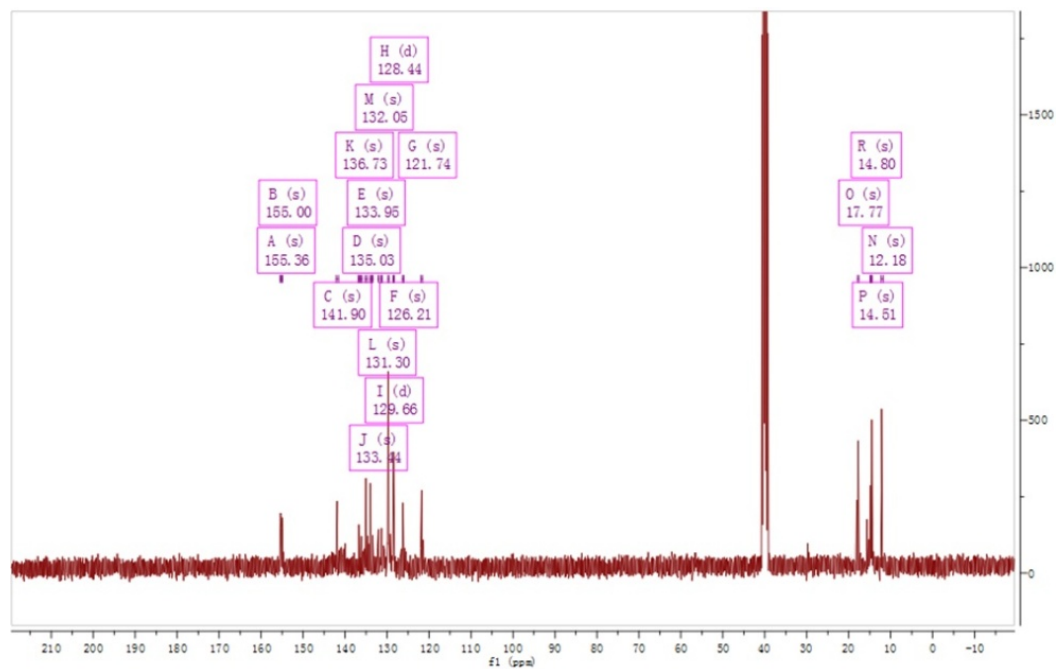

**Fig. S6.**  $^{13}\text{C}$  NMR of Bodipy-Hy. ( $\text{DMSO-d}_6$ )

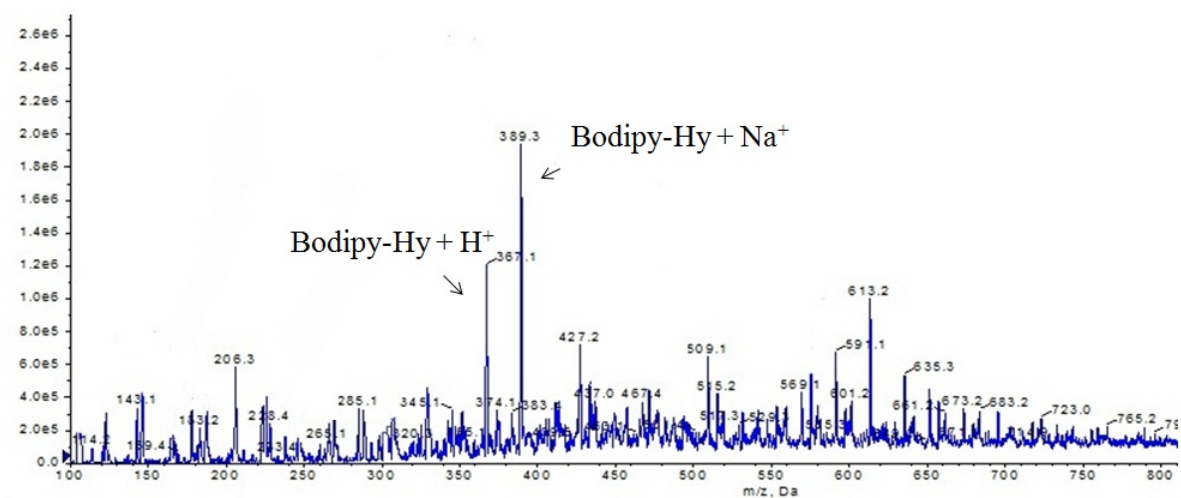

**Fig. S7.** Mass spectrometry of Bodipy-Hy

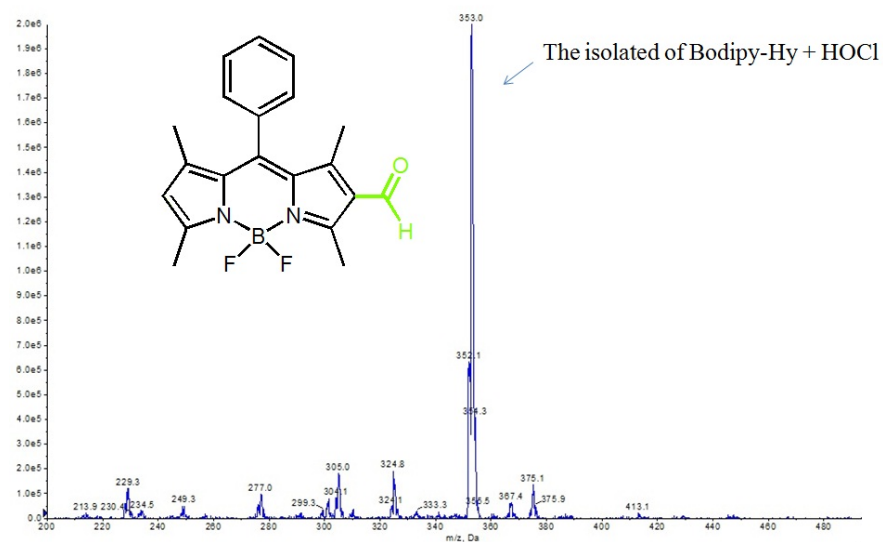

**Figure S8.** Mass spectrometry of isolated Bodipy-Hy + HOCl
